# Supplementary material
Source: PubMed Central journal article supplement (PMC5193464)
Supplement: mol-22-16_017_Pekson_Suppl.pdf [file mol-22-16_017_Pekson_Suppl.pdf]

Supplemental Data

**N,N-Dimethylacetamide Significantly Attenuates LPS- and TNF $\alpha$ -Induced Proinflammatory Responses Via Inhibition of the Nuclear Factor Kappa B Pathway**

Ryan Pekson,<sup>1</sup> Vladimir Poltoratsky,<sup>1</sup> Samir Gorasiya,<sup>1</sup> Sruthi Sundaram,<sup>2</sup> Charles R Ashby, Jr,<sup>1</sup> Ivana Vancurova,<sup>3</sup> and Sandra E Reznik<sup>1,4</sup>

Online address: <http://www.molmed.org>

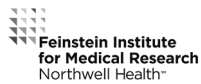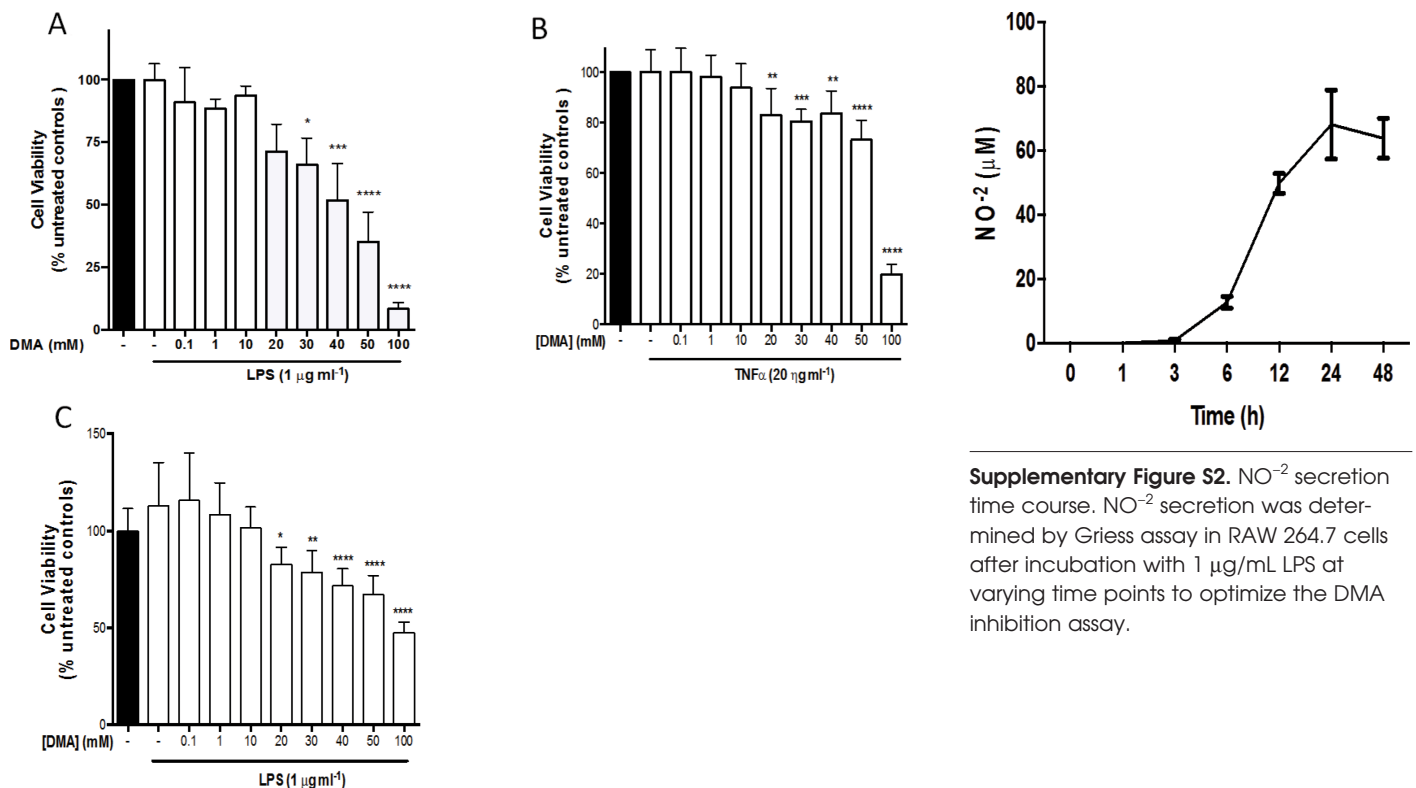

**Supplementary Figure S2.** NO $_2^-$  secretion time course. NO $_2^-$  secretion was determined by Griess assay in RAW 264.7 cells after incubation with 1  $\mu\text{g/ml}$  LPS at varying time points to optimize the DMA inhibition assay.

**Supplementary Figure S1.** MTT cell viability assays. (A) RAW 264.7 cells, (B) JEG-3 cells (C) HEK 293/TLR4 cells. Increasing concentrations of DMA were used as indicated to determine the highest noncytotoxic concentration of DMA in the presence of LPS (RAW 264.7 cells and HEK 293/TLR4 cells) or TNF $\alpha$  (JEG-3 cells). Data shown are means  $\pm$  SEM of at least three independent experiments done in quadruplicate wells. \*  $P \leq 0.05$ ; \*\*  $P \leq 0.01$ ; \*\*\*  $P \leq 0.001$ ; \*\*\*\*  $P \leq 0.0001$ .

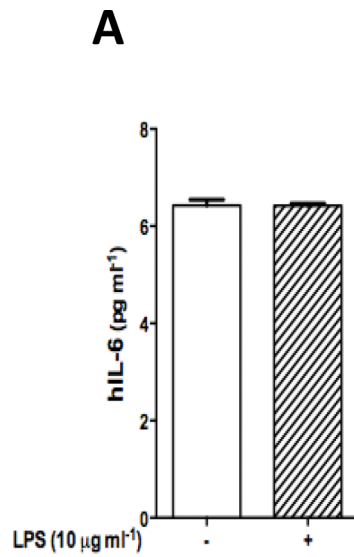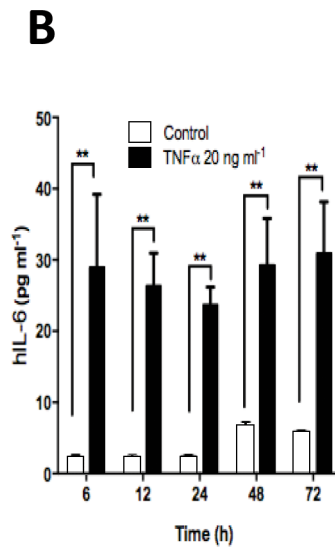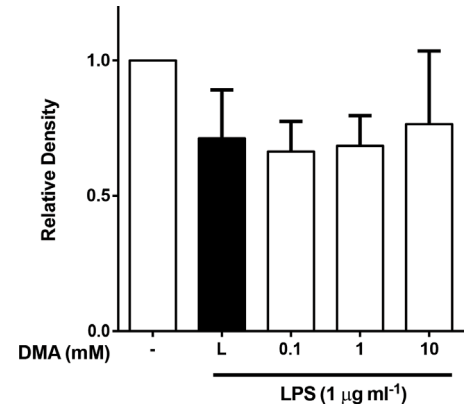

**Supplementary Figure S3.** JEG-3 cells secrete IL-6 in response to TNF $\alpha$  but not LPS. (A) ELISA was performed to determine IL-6 levels in JEG-3 cell supernatants after incubation in the absence or presence of LPS. (B) ELISA was performed to determine IL-6 levels in JEG-3 supernatants in the absence or presence of TNF $\alpha$  at varying time points, as shown. Data shown are means  $\pm$  SEM of at least three independent experiments done in duplicate. \*\* $P < 0.01$ .

**Supplementary Figure S5.** DMA decreases LPS-stimulated I $\kappa$ B $\alpha$  degradation in human placental explants. Placentas were collected from full-term uncomplicated Cesarean deliveries, as described. The effect of various concentrations of DMA on I $\kappa$ B $\alpha$  degradation was determined in the presence or absence of LPS for 15 min. A graphical summary of the relative densities of I $\kappa$ B $\alpha$  immunoblots determined with ImageJ software is shown.

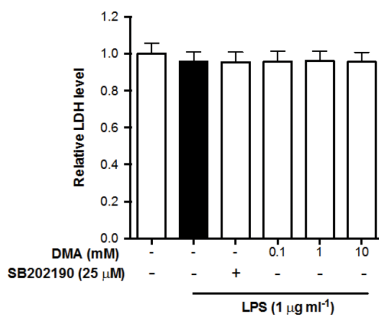

**Supplementary Figure S4.** Placental explant viability assay. LDH assay was performed to evaluate the viability of placental explants after exposure to the experimental conditions as shown.
